# Supplementary material for: Facile synthesis of a Bi2MoO6/TiO2 nanotube arrays composite by the solvothermal method and its application for high-performance supercapacitor
Source: Royal Society of Chemistry journal article supplement (doi:10.1039/c8ra08604d), 2019-01-01
Supplement: c8ra08604d1.pdf [file c8ra08604d1.pdf]

### Supporting information

#### Facile synthesis of a Bi<sub>2</sub>MoO<sub>6</sub> nanosheets/TiO<sub>2</sub> nanotube arrays composite by the solvothermal method and its application for high-performance supercapacitor

Jiang Wen, Shupeí Sun, Bo Zhang, Nianfeng Shi, Xiaoming Liao\*, Guangfu Yin,

Zhongbing Huang, Xianchun Chen, Ximing Pu

College of Materials Science and Engineering, Sichuan University, Chengdu, Sichuan

610065, China

**Table S1.** Experimental conditions of the prepared samples.

| Samples                              | [Precursors] (mmol) <sup>a</sup>                     |                                                     | Temperature<br>(°C) | Time<br>(h) |
|--------------------------------------|------------------------------------------------------|-----------------------------------------------------|---------------------|-------------|
|                                      | Bi(NO <sub>3</sub> ) <sub>3</sub> ·5H <sub>2</sub> O | Na <sub>2</sub> MoO <sub>4</sub> ·2H <sub>2</sub> O |                     |             |
| BMO/TNT-1                            | 1.0                                                  | 0.5                                                 | 160                 | 4           |
| BMO/TNT-2                            | 1.0                                                  | 0.5                                                 | 160                 | 8           |
| BMO/TNT-3                            | 1.0                                                  | 0.5                                                 | 160                 | 12          |
| BMO/TNT-4                            | 1.0                                                  | 0.5                                                 | 160                 | 16          |
| BMO/TNT-5                            | 0.5                                                  | 0.25                                                | 160                 | 12          |
| BMO/TNT-6                            | 2.0                                                  | 1.0                                                 | 160                 | 12          |
| BMO/TNT-7                            | 4.0                                                  | 2.0                                                 | 160                 | 12          |
| BMO/TNT-8                            | 1.0                                                  | 0.5                                                 | 140                 | 12          |
| BMO/TNT-9                            | 1.0                                                  | 0.5                                                 | 180                 | 12          |
| BMO/TNT-10                           | 1.0                                                  | 0.5                                                 | 200                 | 12          |
| Bi <sub>2</sub> MoO <sub>6</sub> /Ti | 1.0                                                  | 0.5                                                 | 160                 | 12          |

<sup>a</sup> 50 ml ethylene glycol add to all the samples as precursor.

To study the effect of precursor amounts on compositions and morphologies of the Bi<sub>2</sub>MoO<sub>6</sub>/TNTs, different amount of Bi(NO<sub>3</sub>)<sub>3</sub>·5H<sub>2</sub>O and Na<sub>2</sub>MoO<sub>4</sub>·2H<sub>2</sub>O (molar ratio 2:1) were dissolved in 50 mL of ethylene glycol. The Bi<sub>2</sub>MoO<sub>6</sub>/TNTs prepared at 160 °C for 12 h with different amount of Na<sub>2</sub>MoO<sub>4</sub>·2H<sub>2</sub>O : 0.25 mmol, 1.0 mmol and 2.0 mmol were referred as BMO/TNT-5, BMO/TNT-6 and BMO/TNT-7 , respectively.

\* Corresponding author. Fax: +86 28 85413003. E-mail: sherman\_xm@163.com (X.M. Liao).

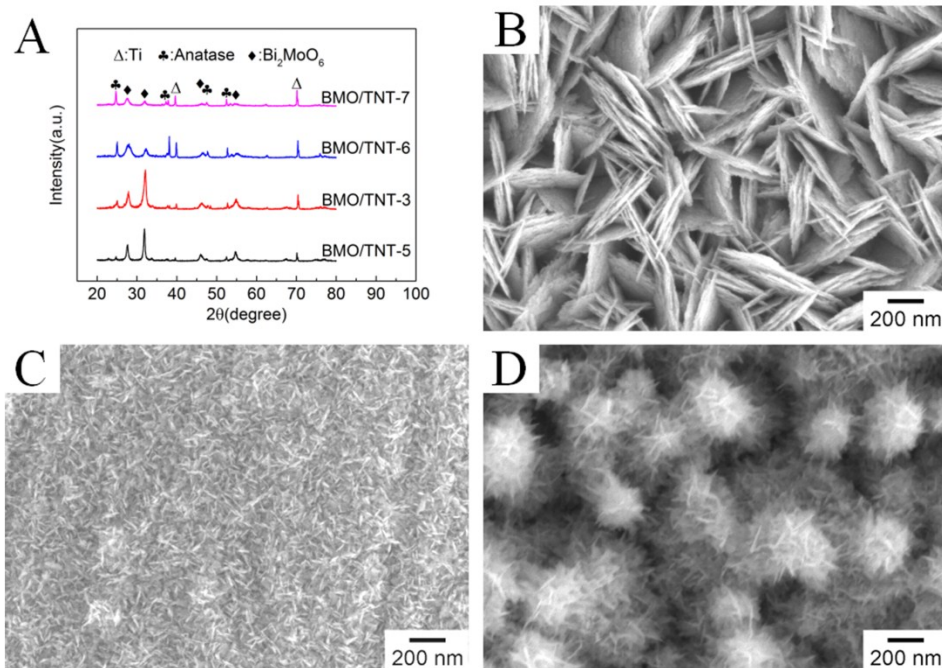

**Fig.S1** XRD patterns of the samples BMO/TNT-5, BMO/TNT-3, BMO/TNT-6 and BMO/TNT-7 (A). SEM images of BMO/TNT-5 (B), BMO/TNT-6 (C), BMO/TNT-7 (D). From Fig. S1A, we can see all samples are composed of Ti, anatase  $\text{TiO}_2$  and  $\text{Bi}_2\text{MoO}_6$ . As can be observed, when the amount of  $\text{Na}_2\text{MoO}_4 \cdot 2\text{H}_2\text{O}$  is 0.25 mmol, the nanosheets are uniformly distributed across the surface without aggregation (Fig. S1B). The surface morphology of BMO/TNT-5 presents thinner nanosheets structure than that of BMO/TNT-3. When the amount is increased to 1.0 mmol, a number of  $\text{Bi}_2\text{MoO}_6$  nanoparticles, instead of nanosheets, grow on the surface of the TNTs. In this case, the TNTs provide a great deal of sites for the adsorption of metal ions ( $\text{Bi}^{3+}$ ,  $\text{Mo}^{6+}$ ) as well as the nucleation and growth of  $\text{Bi}_2\text{MoO}_6$  nanoparticles (Fig. S1C). Increasing the amount further to 2 mmol causes the morphology of the  $\text{Bi}_2\text{MoO}_6$  nanostructures to change significantly. TNTs are partially coated with  $\text{Bi}_2\text{MoO}_6$  nanoflowers (Fig. S1D). It appears that the nanoflowers are composed of a number of nanosheets, which radially grow from the center.

On the basis of the integrated area under the CV curve (Fig. S2A), the areal capacitances of BMO/TNT-3, BMO/TNT-5, BMO/TNT-6, and BMO/TNT-7 are 110.3, 90.1, 74.4 and 56.3  $\text{mF cm}^{-2}$  at a scan rate of  $40 \text{ mV s}^{-1}$ , respectively. From the discharging curves (Fig. S2B), the areal capacitances of those samples are 330, 279,

246 and 235  $\text{mF cm}^{-2}$  at a current density of  $1 \text{ mA cm}^{-2}$ . The results show that the BMO/TNT-3 presents better electrochemical performance.

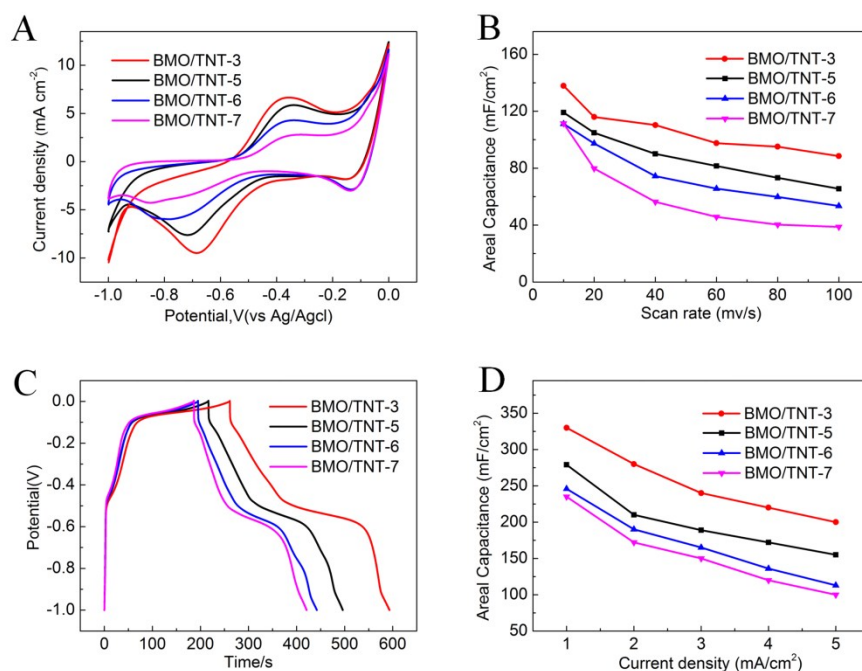

**Fig. S2** The CV plots at a scan rate of  $40 \text{ mV s}^{-1}$  for BMO/TNT-3, BMO/TNT-5, BMO/TNT-6 and BMO/TNT-7 (A), areal capacitances of these samples measured as a function of scan rate (B), The GCD curves at a current density of  $1 \text{ mA cm}^{-2}$  for BMO/TNT-3, BMO/TNT-5 BMO/TNT-6 and BMO/TNT-7 (C), the average areal capacitance at different current densities (D).

As we all know that the semiconducting nature and poor electrical conductivity of  $\text{TiO}_2$  lead to the lower electrochemical activity. From Fig. S3, the areal capacitance of TNTs is only  $5.8 \text{ mF cm}^{-2}$  at a current density of  $1 \text{ mA cm}^{-2}$ . Nevertheless, the areal capacitance of BMO/TNT-3 is  $330.0 \text{ mF cm}^{-2}$  (Fig. S4),  $\sim 57$  times more than the pristine TNTs electrodes.

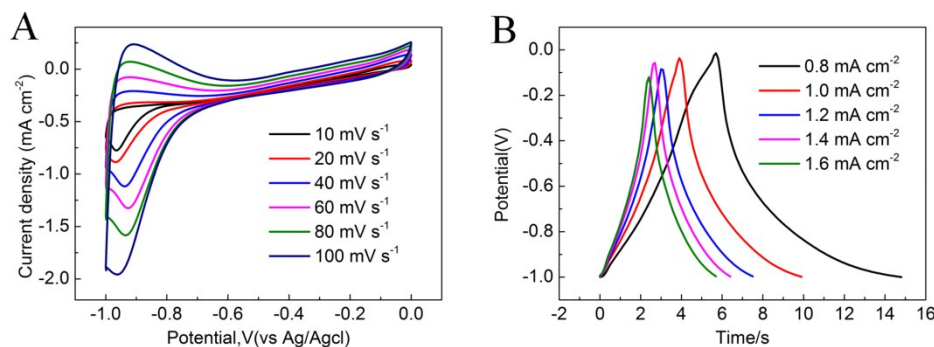

**Fig. S3** the CV plots at different scan rates for TNTs (A), galvanostatic charge–discharge curves for TNTs achieved from  $0.8 \text{ mA cm}^{-2}$  to  $1.6 \text{ mA cm}^{-2}$  (B).

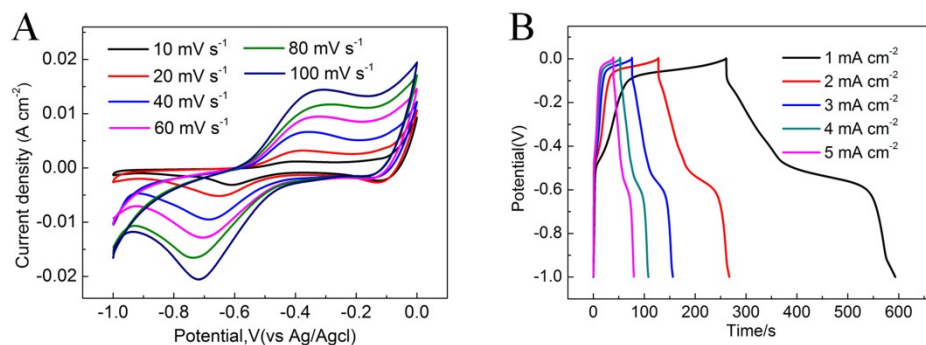

**Fig. S4** the CV plots at different scan rates for BMO/TNT-3 (A), galvanostatic charge–discharge curves for BMO/TNT-3 achieved from 1.0 mA cm<sup>-2</sup> to 5.0 mA cm<sup>-2</sup> (B).

In the end, by simply tuning the temperature of the solvothermal treatment, while keeping the precursor amount (1.0 mmol Bi(NO<sub>3</sub>)<sub>3</sub>·5H<sub>2</sub>O and 0.5 mmol Na<sub>2</sub>MoO<sub>4</sub>·2H<sub>2</sub>O) and reaction time (12 h) unchanged, the morphology of the Bi<sub>2</sub>MoO<sub>6</sub> nanostructures grown on TNTs can be further controlled. The Bi<sub>2</sub>MoO<sub>6</sub>/TNTs composites prepared at 140°C, 180°C, 200°C for 12 h were referred as BMO/TNT-8, BMO/TNT-9, BMO/TNT-10, respectively.

Fig. S5B-D shows the SEM images of the BMO/TNT-8, BMO/TNT-9, and BMO/TNT-10, respectively. A lot of Bi<sub>2</sub>MoO<sub>6</sub> nanoflakes grow on the surface of TNTs during the solvothermal treatment at 140 °C. When the temperature increases to 180 °C, the thin Bi<sub>2</sub>MoO<sub>6</sub> nanoflakes are more compact. However, a further increase in the temperature to 200°C causes the morphology of the Bi<sub>2</sub>MoO<sub>6</sub> to present non-uniform distributed nano-block structures.

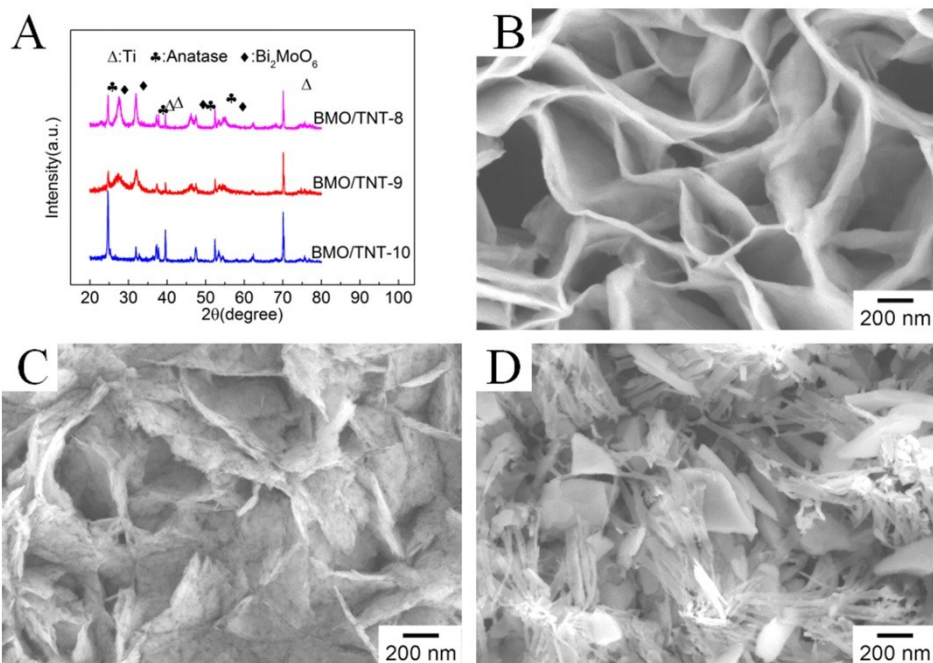

**Fig.S5** XRD patterns of the samples BMO/TNT-8, BMO/TNT-9 and BMO/TNT-10 (A). SEM images of BMO/TNT-8 (B), BMO/TNT-9 (C), BMO/TNT-10 (D).

From Fig. S6, the areal capacitances of BMO/TNT-3, BMO/TNT-8, BMO/TNT-9, and BMO/TNT-10 were 330, 265, 245 and 84  $\text{mF cm}^{-2}$  at a current density of 1  $\text{mA cm}^{-2}$ , respectively. It demonstrates that the proper reaction temperature can be propitious to improve the electrochemical properties of the composite electrode.

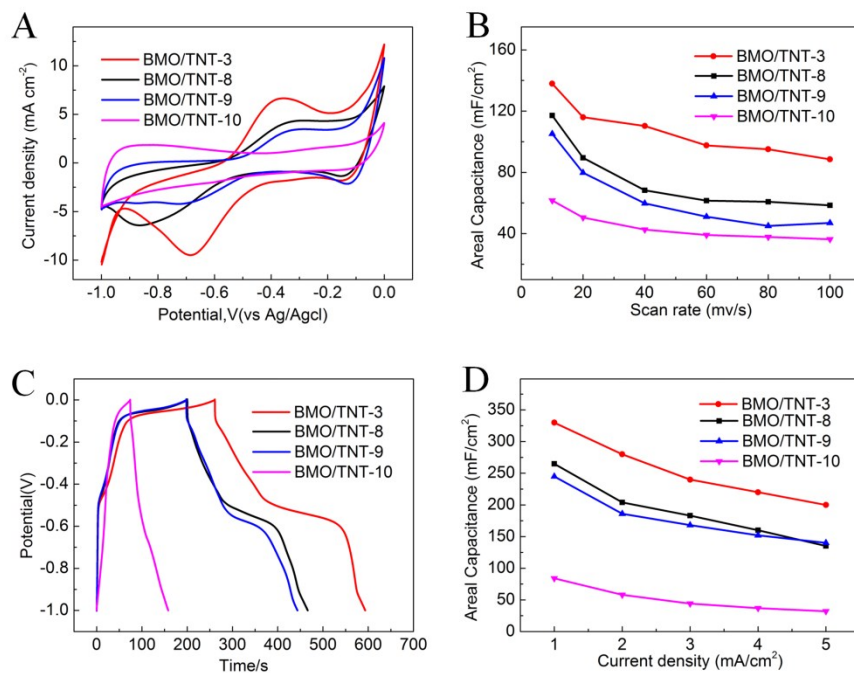

**Fig. S6** The CV plots at a scan rate of 40 mV s<sup>-1</sup> for BMO/TNT-3, BMO/TNT-8, BMO/TNT-9 and BMO/TNT-10 (A), areal capacitances of these samples measured as a function of scan rate (B), The GCD curves at a current density of 1 mA cm<sup>-2</sup> for BMO/TNT-3, BMO/TNT-8, BMO/TNT-9 and BMO/TNT-10 (C), the average areal capacitance at different current densities (D).

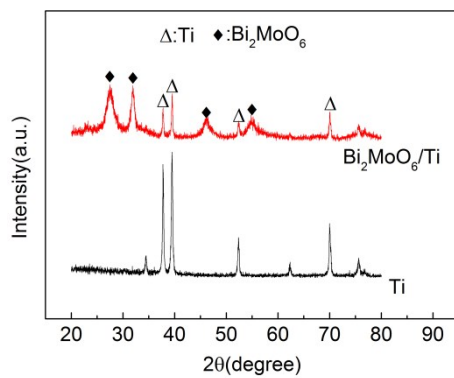

**Fig.S7** XRD patterns of the samples Ti and Bi<sub>2</sub>MoO<sub>6</sub>/Ti.
